# Supplementary material for: Sexualized drug use and specialist service experience among MSM attending urban and rural sexual health clinics in England and Scotland
Source: PubMed Central journal article supplement — Int J STD AIDS. 2021 Sep 21;32(14):1338–46. doi: 10.1177/09564624211041456 (PMC8649810; doi:10.1177/09564624211041456), 2021-09-21
Supplement: sj-pdf-1-std-10.1177_09564624211041456.pdf [file sj-pdf-1-std-10.1177_09564624211041456.pdf]

**Supplementary material 1: Recruitment by SHC sites included in the Drugs and Sex survey, defined by urban/rural classification.**

| <b>SHC</b>                                                                                                                                                                                                                                                                             | <b>Urban/rural classification</b>                                    | <b>Number of eligible surveys included in final analysis</b> |
|----------------------------------------------------------------------------------------------------------------------------------------------------------------------------------------------------------------------------------------------------------------------------------------|----------------------------------------------------------------------|--------------------------------------------------------------|
| <b>Berkshire</b><br><br><i>The Garden clinic</i><br><br><i>St Marks Hospital</i><br><br><i>Skimped Hill Centre</i>                                                                                                                                                                     | Urban<br>Urban<br>Urban                                              | <b>Urban: 218</b>                                            |
| <b>Cornwall</b><br><br><i>Bodmin</i><br><br><i>Falmouth Health Centre</i><br><br><i>Liskeard Community</i><br><br><i>Hospital</i><br><br><i>Newquay</i><br><br><i>West Cornwall Hospital</i><br><br><i>Royal Cornwall Hospital</i><br><br><i>St Austell</i><br><br><i>St Michael's</i> | Rural<br>Rural<br>Rural<br>Rural<br>Rural<br>Rural<br>Rural<br>Rural | <b>Rural: 429</b>                                            |
| <b>East of England</b><br><br><i>Vancouver House</i><br><br><i>Orwell Clinic</i><br><br><i>Lime Tree Clinic</i><br><br><i>Oak Tree Centre</i><br><br><i>King's Chambers</i>                                                                                                            | Rural<br>Urban<br>Urban<br>Rural<br>Urban                            | <b>Rural: 127</b><br><br><b>Urban: 370</b>                   |

|                                     |                            |                   |
|-------------------------------------|----------------------------|-------------------|
| <i>Oak Street</i>                   | Urban                      |                   |
| <i>Breydon Clinic</i>               | Urban                      |                   |
| <i>Abbey View</i>                   | Urban                      |                   |
| <b>Leeds</b>                        |                            | <b>Urban: 231</b> |
| <i>Leeds Sexual health</i>          | Urban                      |                   |
| <b>London</b>                       |                            | <b>Urban: 495</b> |
| <i>Mortimer market</i>              | Urban                      |                   |
| <b>North Devon</b>                  |                            | <b>Rural: 32</b>  |
| <i>North Devon District</i>         | Rural                      | <b>Urban: 176</b> |
| <i>General, Exeter GUM</i>          | Urban                      |                   |
| <i>Clinic</i>                       |                            |                   |
| <b>North Yorkshire</b>              |                            | <b>Rural: 127</b> |
| <i>Harrogate District Hospital,</i> | Rural                      | <b>Urban: 57</b>  |
| <i>Monkgate Health Centre,</i>      | Urban                      |                   |
| <i>Northway Clinic</i>              | Rural                      |                   |
| <b>Nottingham</b>                   |                            | <b>Urban: 206</b> |
| <i>Nottingham City Hospital</i>     | Urban                      |                   |
| <b>Scotland</b>                     |                            | <b>Rural: 97</b>  |
| <i>Sandyford Central</i>            | Urban                      | <b>Urban: 90</b>  |
| <i>Highland Sexual Health</i>       | Rural                      |                   |
|                                     | <b>Total Urban surveys</b> | <b>1843</b>       |
|                                     | <b>completed</b>           | <b>812</b>        |
|                                     | <b>Total Rural surveys</b> |                   |
|                                     | <b>completed</b>           | <b>2655</b>       |
